# Supplementary material for: Multiresolution continuous wavelet transform for studying coupled solute–solvent vibrations via ab initio molecular dynamics
Source: Royal Society of Chemistry journal article supplement (doi:10.1039/d0cp02495c), 2020-01-01
Supplement: d0cp02495c4.pdf [file d0cp02495c4.pdf]

# Supporting Information for: Multiresolution Continuous Wavelet Transform for Studying Coupled Solute-Solvent Vibrations from Ab-Initio Molecular Dynamics

Greta Donati,<sup>†,‡</sup> Alessio Petrone,<sup>†</sup> and Nadia Rega<sup>\*,†,¶</sup>

<sup>†</sup>*Department of Chemical Sciences, University of Napoli 'Federico II', Complesso  
Universitario di M. S. Angelo, Via Cintia, I-80126 Napoli Italy.*

<sup>‡</sup>*Present Address: Department of Chemistry and Biology, University of Salerno, Via  
Giovanni Paolo II 132, 84084 Fisciano(SA), Italy*

<sup>¶</sup>*Center for Advanced Biomaterials for Healthcare@CRIB, Largo Barsanti e Matteucci 53,  
I-80125, Napoli Italy*

E-mail: [nadia.rega@unina.it](mailto:nadia.rega@unina.it)

## 1 Amide Modes Analysis from QM Clusters

In Fig. 1 the amide I, II, III and IV modes composition obtained from the Hessian based analysis are presented. This normal modes analysis has been performed on the NMA cluster including the closest water molecules to the NMA oxygen and *N - H* hydrogen.

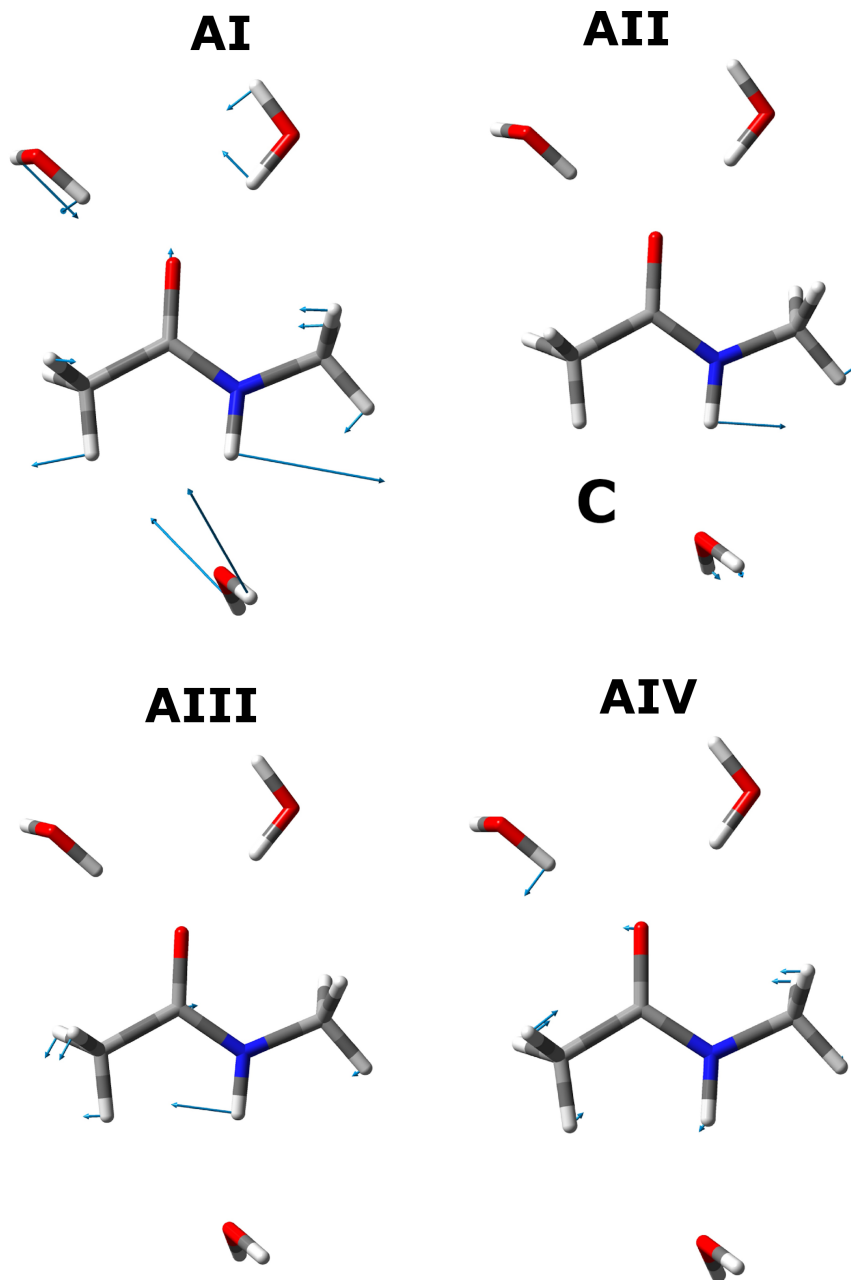

Figure 1. NMA cluster amide modes from Hessian based analysis.

## 2 Vibrational Spectra of Amide Bands from Fourier Transform

The Fourier transforms of the modes velocity autocorrelation functions obtained from Analysis 1 are performed.

The Fourier power spectrum in Fig. 2 shows a well-separated amide I mode in agreement with the nicely isolated mode described in the previous section. The amide I band presents two main peaks at  $1606\text{ cm}^{-1}$  and  $1612\text{ cm}^{-1}$  surrounded by other minor peaks at both the sides. This fact confirms a dynamical and very sensible to the environment nature of the mode for which a unique representative frequency value is not enough. The nature of this splitting can be attributed to different interactions with the environment, in particular concerning specific interactions such as hydrogen bonds as already supposed.<sup>1,2</sup>

Also in the full QM clusters calculations (data not shown) we found two frequency values associated to the mode at  $1569$  and  $1588\text{ cm}^{-1}$  (anharmonic values) and of  $1613\text{ cm}^{-1}$  and  $1621\text{ cm}^{-1}$  (anharmonic values) for the QM/MM cluster.

The typical red shift of the mode in water solution is so nicely reproduced in both the analyses from AIMD and in the cluster calculations, indeed comparing our results with the experimental ones,<sup>3</sup> an almost quantitative agreement with the typical band red-shift that is around  $100\text{ cm}^{-1}$  compared to the gas phase<sup>4</sup> is found.

We show the amide II power spectrum in Fig. 2. The mode has been successfully separated and appears as a defined band with the main peak at  $1514\text{ cm}^{-1}$  and a small shoulder at  $1517\text{ cm}^{-1}$ . Another important peak is found at  $1500\text{ cm}^{-1}$ . The typical amide II blue shift observed experimentally in water solution is reproduced although not quantitatively, indeed a blue shift of  $80\text{ cm}^{-1}$  (relative to the gas phase) should be observed.<sup>3</sup> The lack of a significant amide II blue shift could be due to the fact that the solute is described at QM level, and surrounding waters at MM level of theory. Indeed the interaction between the amide hydrogen with the nearest water molecule is poorly described because the water oxygen is described only by a partial negative charge and not by an explicit treatment of the electronic density therefore this causes a poor representation of the hydrogen bond interaction.

The amide II obtained from the QM cluster calculation shows a significant quantitative agreement with the experiment, indeed the anharmonic value is at  $1568\text{ cm}^{-1}$ . In the

QM/MM cluster, once obtained the ad hoc parameters for the van der Waals wall-depth to describe in a correct way the H(amide)-O(wat) interaction, we have reproduced a blue shift comparable with experimental one, with an anharmonic value of  $1562\text{ cm}^{-1}$ .

The band observed in Fig. 2 presents two main peaks around  $1254$  and  $1273\text{ cm}^{-1}$ . On average it is centered at  $1265\text{ cm}^{-1}$  with a blue shift of  $10\text{ cm}^{-1}$  in respect to the gas phase.<sup>4</sup> A qualitative reproduction of the blue shift is obtained but it is not quantitative. As the amide II band, the experimental blue shift, which is of about  $58\text{ cm}^{-1}$  is difficult to reproduce. Our cluster calculations resemble more to the experimental value, indeed we find an amide III band at  $1306\text{ cm}^{-1}$  for the QM cluster and  $1295\text{ cm}^{-1}$  for the QM/MM one (anharmonic values).

A very good agreement with the experimental value<sup>1,3</sup> is found for the amide IV mode, indeed, as we can see from the spectrum in Fig. 2, the band is centered at  $630\text{ cm}^{-1}$ , while the experimental value is at  $632\text{ cm}^{-1}$ . Also in the clusters we find a good agreement (although it is underestimated), with anharmonic values of  $615$  and  $616\text{ cm}^{-1}$  for the QM and QM/MM clusters, respectively.

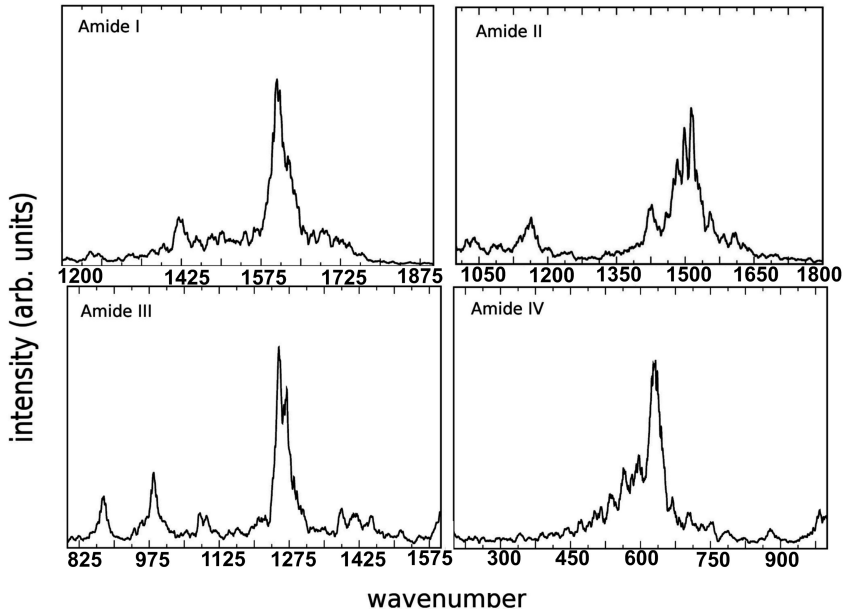

**Figure 2.** The amide modes Fourier power spectra obtained from AIMD of NMA in water solution.

**Table 1.** Half width half maximum comparison for experimental (from Ref. 4 for the steady state, and from Ref. 5 for the time-resolved) and computed amide mode bandwidths. All the values are in wavenumber.

|                              | Amide I | Amide II | Amide III |
|------------------------------|---------|----------|-----------|
| Experiment (steady state)    | ~30     | ~30      | ~20       |
| Experiment (time-resolved)   | ~75     | -        | -         |
| This work (wavelet analysis) | ~125    | ~130     | ~70       |
| This work (FT)               | ~35     | ~40      | ~18       |

## References

- (1) Torii, H.; Tatsumi, T.; Tasumi, M. *J. Raman Spectrosc.* **1998**, *29*, 537.
- (2) Gaigeot, M. P.; Vuilleumier, R.; Sprik, M.; Borgis, D. *J. Chem. Theory Comput.* **2005**, *1*, 772.
- (3) Chen, X.; Schweitzer-Stenner, R.; Asher, S.; Mirkin, N.; Krimm, S. *J. Phys. Chem.* **1995**, *99*, 3074.
- (4) Kubelka, J.; Keiderling, T. *J. Phys. Chem. A* **2001**, *105*, 10922.
- (5) Tan, J.; Zhang, J.; Li, C.; Luo, Y.; Ye, S. Ultrafast Energy Relaxation Dynamics of Amide I Vibrations Coupled with Protein-Bound Water Molecules. *Nat. Commun.* **2019**, *10*, 1–6.
